# Supplementary material
Source: Springer Nature journal article supplement (https://www.springermedizin.de/resource/supplementary/13014_2012_803_MOESM5_ESM.pdf/9634764)

# M059K

LTL → IR ± DMSO → Treatment at shown temperature in TEN → PFGE

**A**

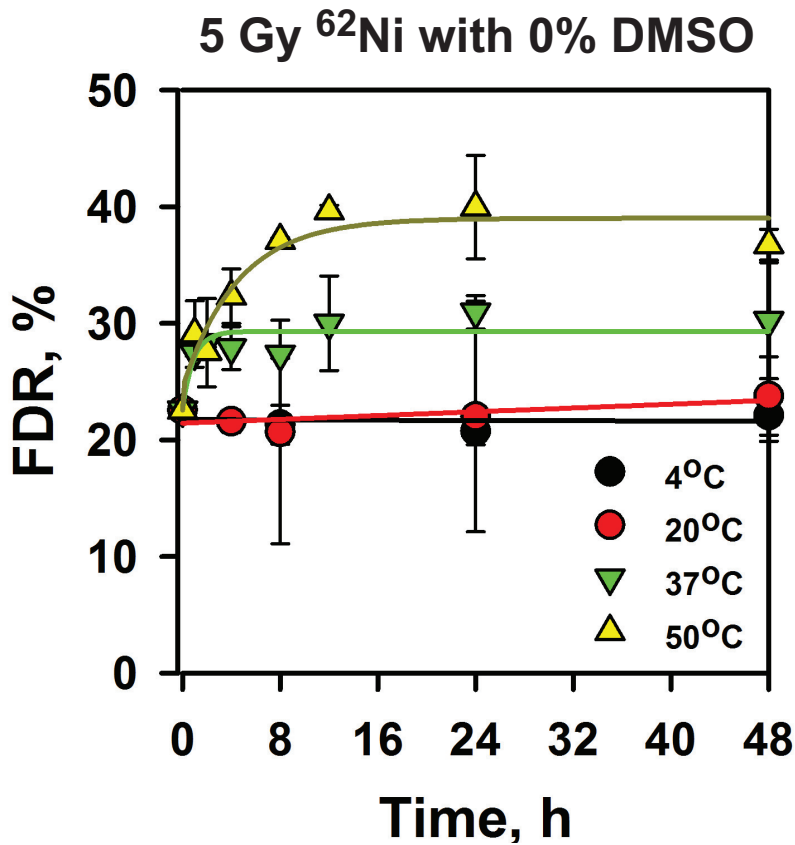

**B**

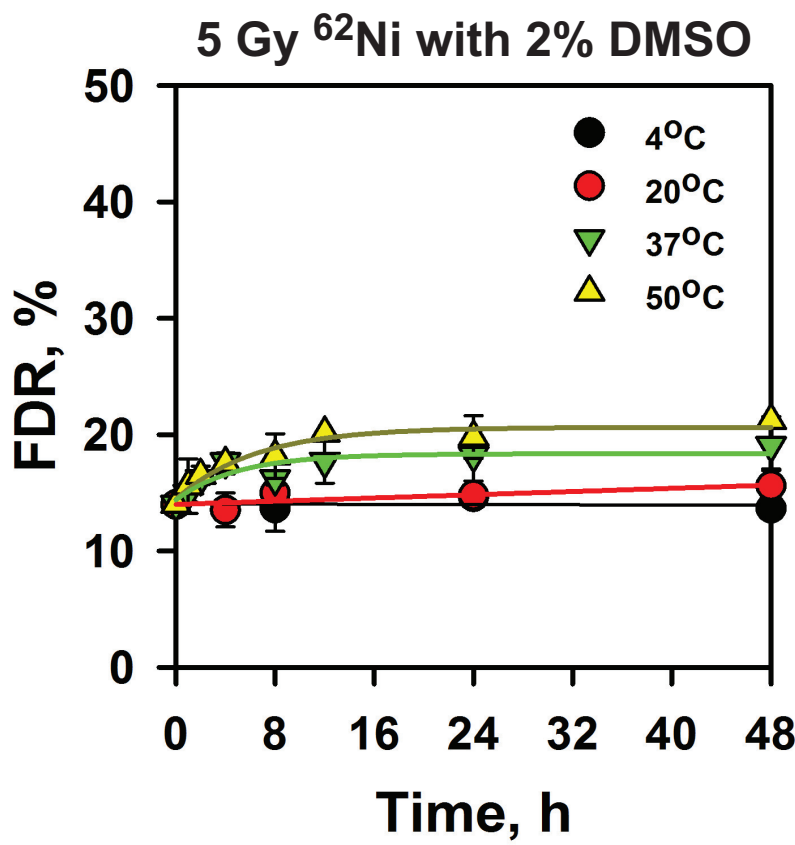

Supplement: MOESM5 [file 9634764]
